# Supplementary material for: The microbial community metabolic regime adapts to hydraulic disturbance in river– lake systems with high–frequency regulation
Source: Research Square preprint supplement (doi:10.21203/rs.3.rs-6789960/v1), 2025-10-06
Supplement: Supplementary file 1 [file 28194b334f2df1163f6fc0a0.docx]

**Supplementary Materials for**

**The microbial community metabolic regime adapts to hydraulic disturbance in river–lake systems with high–frequency regulation**

Jiewei DINGa, Wei YANGa,b*, Xiaoxiao Lic, Xinyu LIUa, Jiayue ZHAOa, Tao Suna,b, Haifei LIUa

a State Key Laboratory of Regional Environment and Sustainability, School of Environment, Beijing Normal University, Beijing 100875, China

b Yellow River Estuary Wetland Ecosystem Observation and Research Station, Ministry of Education, Dongying, China

c School of Biosciences, University of Sheffield, Sheffield, S10 2TN, United Kingdom

*Corresponding author: yangwei@bnu.edu.cn (Wei YANG), Tel. 159-118-1787, Fax 010-5880-5053

Corresponding author at: No. 19 Xinjiekouwai St., Haidian District, 100875 Beijing, China

This file includes:

Supplementary Figures S1 to S4

Supplementary Tables S1 to S2

Supplementary Text

Supplementary References

**Supplementary figures**


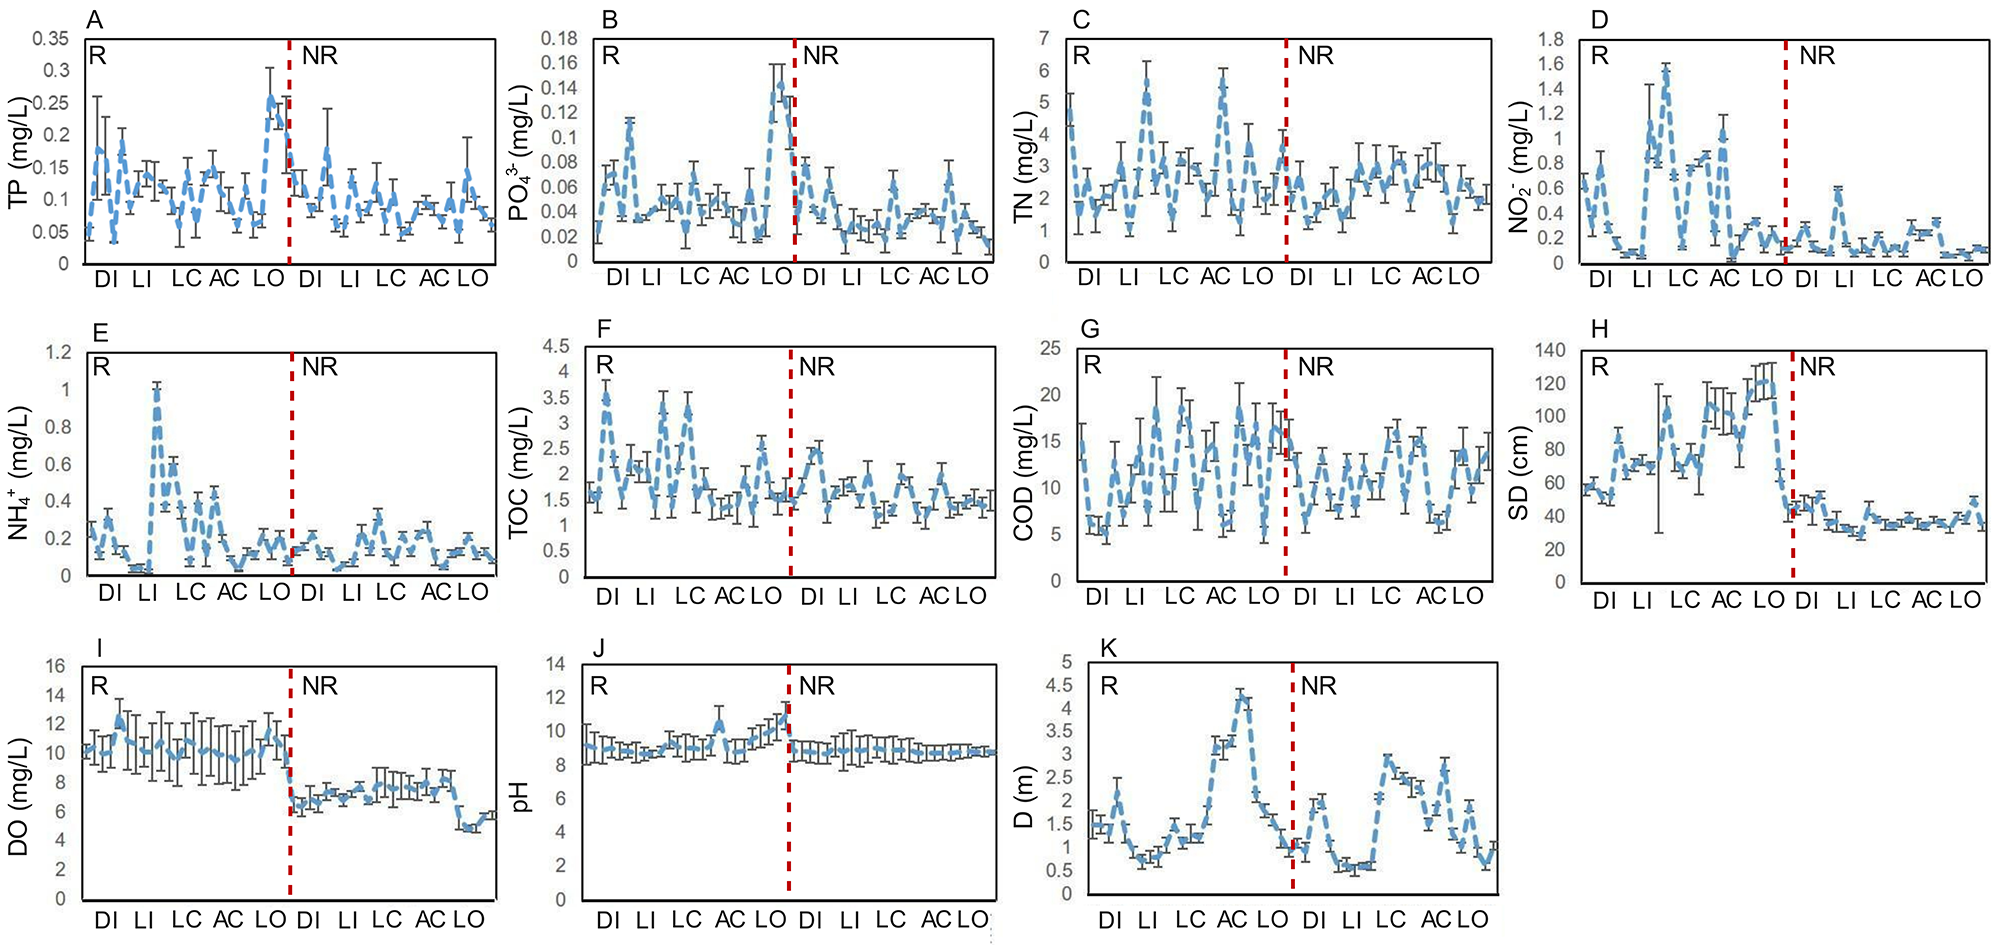


**Fig. S1.** (A) total phosphorus (*TP*), (B) phosphate (PO43-), (C) total nitrogen (*TN*), (D) nitrite (NO2-), (E) ammonium (NH4+), (F) total organic carbon (*TOC*), (G) chemical oxygen demand (*COD*), (H) Secchi depth (*SD*), (I) dissolved oxygen (*DO*), (J) pH, and (K) water depth (*D*) in the water R and NR periods.


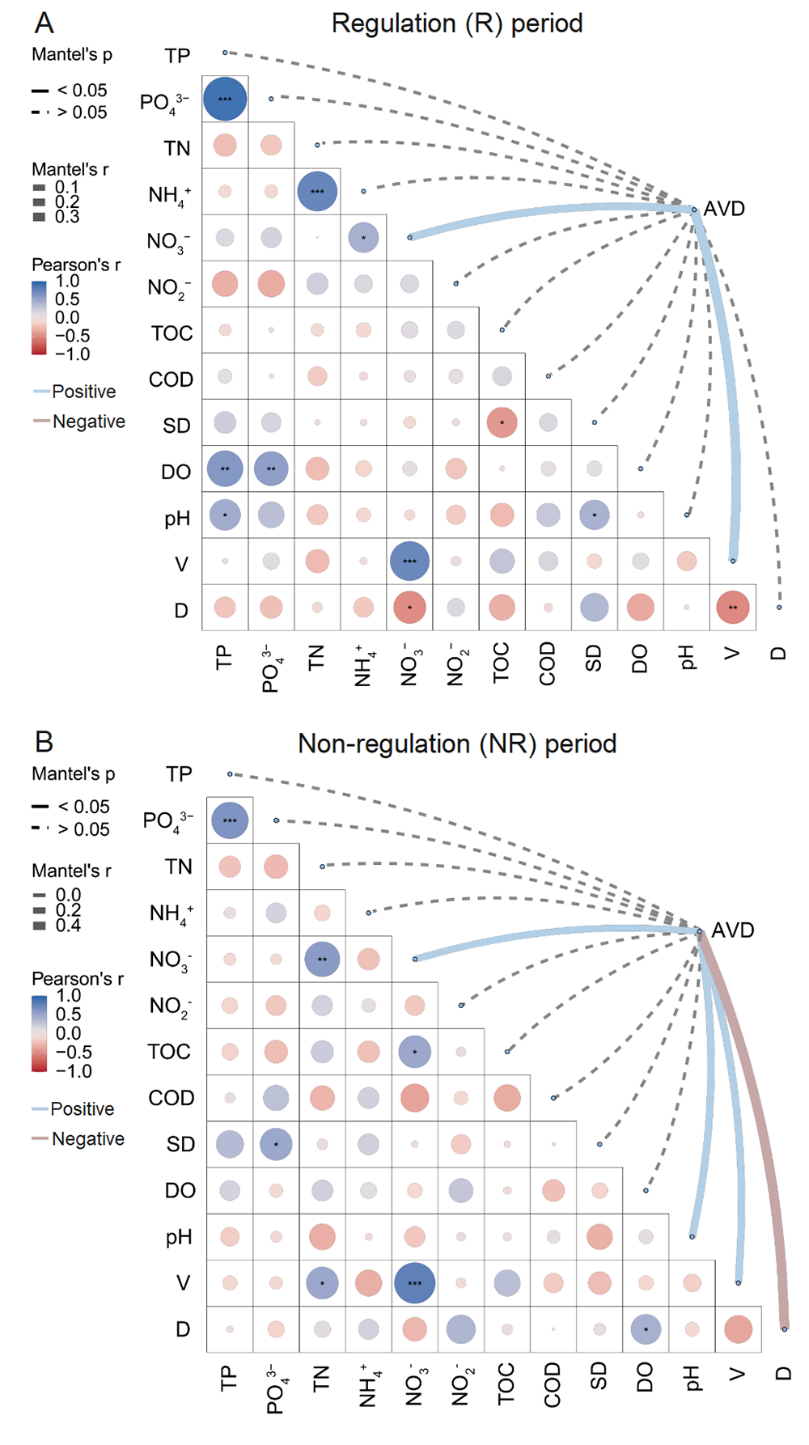


**Fig. S2.** Environmental factors affecting the average variation degree (*AVD*) of the microbial communities during the (A) R and (B) NR periods.


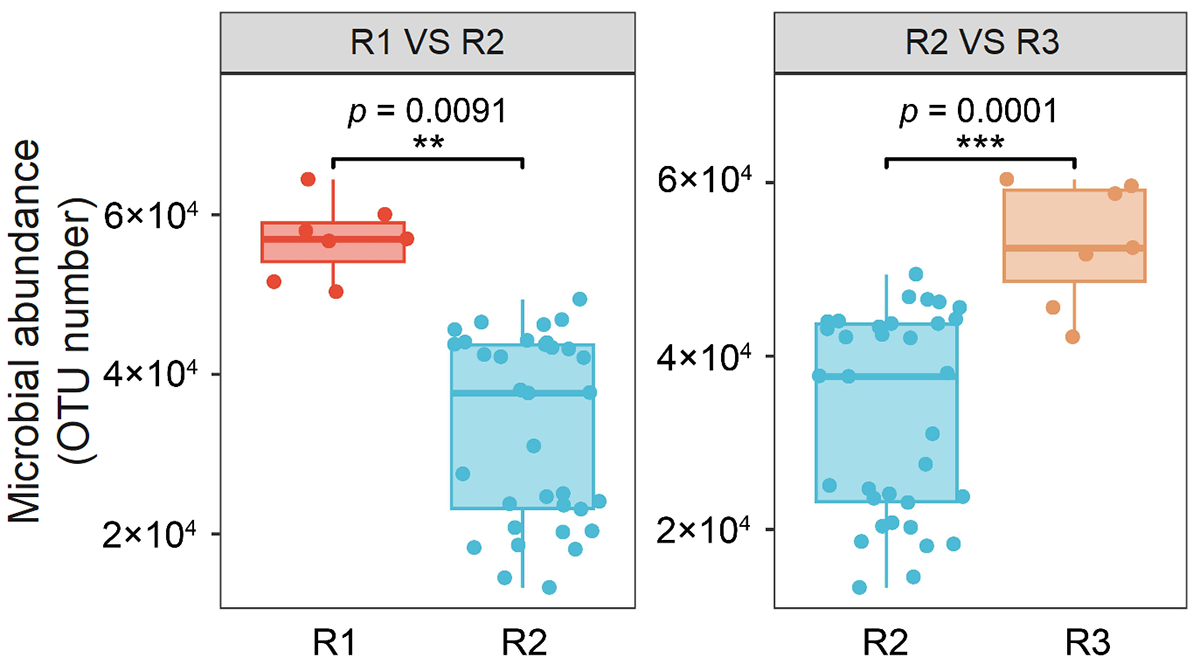


**Fig. S3.** Kruskal-Wallis non-parametric test of microbial communities under different regimes.


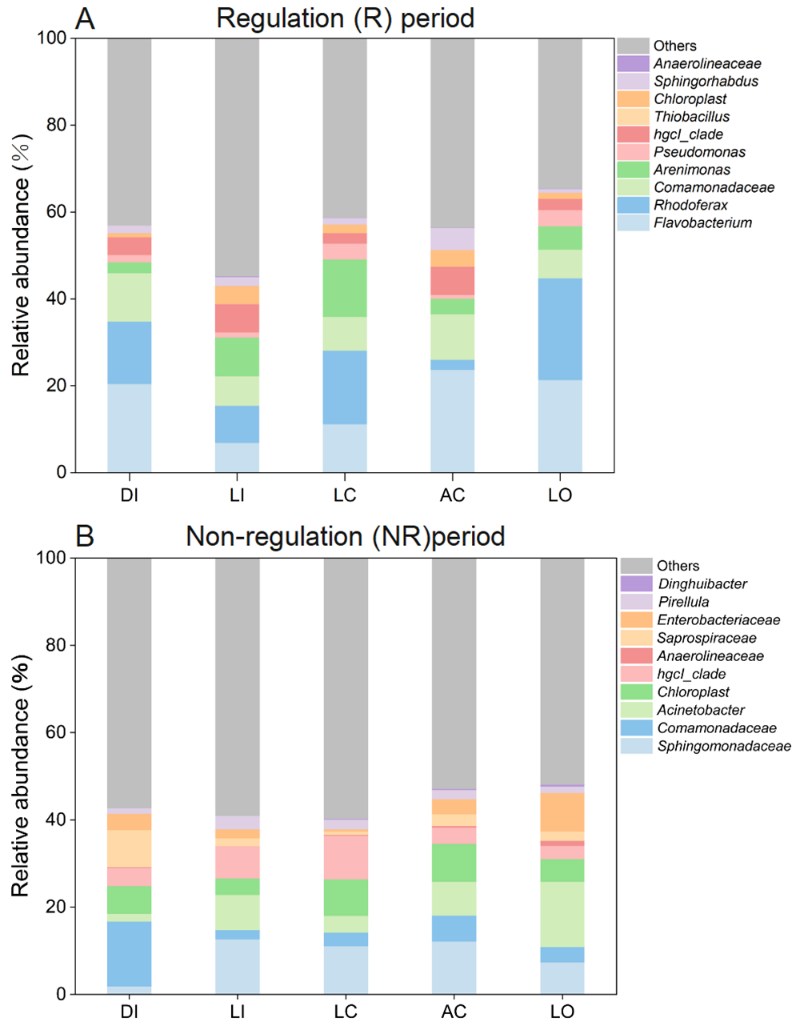


**Fig. S4.** Dominant microorganisms during the (A) R and (B) NR periods.

**Supplementary tables**

**Table S1** Testing standards for the physical and chemical properties of the surface water.

| Indexes | Testing standards and specifications from Ministry of Ecology and Environment of the People's Republic of China |
| --- | --- |
| Total phosphorus, *TP* (mg/L) | GB/T11893-1989 |
| Phosphate, PO43- (mg/L) | HJ 84-2016 |
| Total nitrogen, *TN* (mg/L) | HJ 636-2012 |
| Ammonium nitrogen, NH4+-N (mg/L) | HJ 535-2009 |
| Nitrate nitrogen, NO3--N (mg/L) | HJ 84-2016 |
| Nitrite nitrogen, NO2--N (mg/L) | HJ 84-2016 |
| Chemical oxygen demand, *COD* (mg/L) | HJ 828-2017 |
| Total organic carbon, *TOC* (mg/L) | HJ 828-2017 |

**Table S2** Metabolic functions of the keystone microorganisms in each module of the microbial co-occurrence network.

| Module | Keystone taxon | Major metabolic function | Reference |
| --- | --- | --- | --- |
| Module 1 | *Aeromonas* | Denitrification | [1] |
| *Pseudomonas* | Denitrification and dephosphorization | [2] |
| *Flavobacterium* | Denitrification | [3] |
| *Acinetobacter* | Denitrification | [4] |
| *Arthrobacter* | Hydrocarbon degradation | [5] |
| *Arenimonas* | Denitrification | [6] |
| Module 2 | *Fluviicola* | Degradation of polysaccharides and peptides | [7] |
| *Desulfobulbus* | Sulfate reduction | [8] |
| *Sediminibacterium* | Reductive dechlorination | [9] |
| *Thiobacillus* | Sulfur oxidation | [10] |
| Module 3 | *Pseudoxanthomonas* | Degradation of organic compounds | [11] |
| *Streptomyces* | Glycolysis | [12] |
| *Thauera* | Phenolic degradation | [13] |
| *Hyphomicrobium* | Degradation of organic pollutants | [14] |
| Module 4 | *Rhodococcus* | Degradation of organic hydrocarbons | [15] |
| *Nocardia* | Petroleum hydrocarbon degradation | [16] |
| *Sphingomonas* | Degradation of aromatic hydrocarbons | [17] |
| Module 5 | *Desulfovibrio* | Sulfate reduction | [18] |
| *Sphaerotilus* | Degradation of organic matter | [19] |
| *Desulfosarcinaceae* | Sulfate reduction | [20] |
| Module 6 | *Shewanella* | Iron reduction | [21] |
| *Geobacter* | Iron reduction | [22] |
| Module 7 | *Acinetobacter* | Denitrification | [23] |
| *Curvibacter* | Iron oxidation | [24] |
| *Bacillus* | Phosphorus solubilization | [25] |

**Supplementary text**

**Sampling method and detection index**

Water samples were collected at a depth of 0.5 m below the water surface. We used a HACH HQ30d portable measuring instrument (HACH, Loveland, CO, USA) to conduct in-situ measurements of pH and dissolved oxygen (DO) in the water. Water transparency was measured in situ using a Secchi disk (SD). Water depth (D) and flow velocity (V) were determined using a SpeedTech depth finder (SM-5A, Beijing, China) and a Doppler current meter (SF-6526J-21, Oriental Glass (Beijing) Technology Co., Ltd., Beijing, China), respectively. Furthermore, we measured the concentration of total phosphorus (TP), phosphate (PO43-), total nitrogen (TN), ammonia nitrogen (NH4+), nitrate nitrogen (NO3-), nitrite nitrogen (NO2-), total organic carbon (TOC), and chemical oxygen demand (COD) in the water.

**16S rRNA and metagenomic sequencing**

**16S rRNA sequencing**

We extracted the microbial community’s genomic DNA from water samples using the E.Z.N.A. soil DNA Kit (Omega Bio-tek, Norcross, GA, U.S.) according to the manufacturer’s instructions. The quality of the DNA extract was verified on 1% agarose gel, and its concentration and purity were assessed with a NanoDrop 2000 UV-vis spectrophotometer (Thermo Scientific, Wilmington, DE, USA). The V3–V4 hypervariable region of the bacterial 16S rRNA gene was amplified with the primer pairs 515F (5'-GTGCCAGCMGCCGCGGTAA-3') and 806R (5'-GGACTACHVGGGTWTCTAAT-3') using a GeneAmp 9700 PCR thermocycler (Applied Biosystems, Foster City, CA, USA). PCR amplification of the 16S rRNA gene was performed with an initial denaturation at 95 ℃ for 3 min, followed by 27 cycles of denaturing at 95 ℃ for 30 s, annealing at 55 ℃ for 30 s, and extension at 72 ℃ for 45 s, followed by a single extension at 72 ℃ for 10 min, and with final extension at 4 ℃. The PCR mixtures contained 4 μL of 5× *TransStart* FastPfu buffer (Transgen Biotech, Beijing China), 2 μL of 2.5 mM dNTPs, 0.8 μL of the forward primer (5 μM), 0.8 μL of the reverse primer (5 μM), 0.4 μL of *TransStart* FastPfu DNA Polymerase 0.4 μL, 10 ng of template DNA, and with double-distilled water added to a final volume of 20 μL. PCR reactions were performed three times. The PCR products were extracted from 2% agarose gel and purified using the AxyPrep DNA Gel Extraction Kit (Axygen Biosciences, Union City, CA, USA) according to the manufacturer’s instructions and were quantified using a Quantus Fluorometer (Promega, Madison, WI, USA).

The purified amplicons were pooled in equimolar solution and paired-end-sequenced on an Illumina MiSeq PE300 platform/NovaSeq PE250 platform (Illumina, San Diego, CA, USA) following standard protocols. This analysis was performed by Majorbio Bio-Pharm Technology Co. Ltd. (Shanghai, China).

**Metagenomic sequencing**

For metagenomic sequencing, we extracted total genomic DNA from water samples using the E.Z.N.A. Soil DNA Kit (Omega Bio-tek). We measured the concentration and purity of the extracted DNA using a TBS-380 fluorometer and a NanoDrop 2000 spectrophotometer (Thermo Scientific), respectively. The integrity and quality of the DNA extract were verified by electrophoresis on 1% agarose gel. DNA extracts were fragmented to an average size of about 400 bp using a Covaris M220 (Gene Company Limited, Shanghai, China) for paired-end library construction. The paired-end library was constructed using a NEXTflex Rapid DNA-Seq (Bioo Scientific, Austin, TX, USA). Adapters containing the full complement of sequencing primer hybridization sites were ligated to the blunt-end of the fragments. Subsequently, paired-end sequencing was performed using an Illumina NovaSeq (Illumina Inc.) at Majorbio Bio-Pharm Technology Co., Ltd. (Shanghai, China) using NovaSeq Reagent Kits according to the manufacturer’s instructions (www.illumina.com).

**Gene prediction**

Open reading frames (ORFs) in contigs were identified using MetaGene ([26] http://metagene.cb.k.u-tokyo.ac.jp/). The predicted ORFs with a length of 100 bp or more were retrieved and translated into amino acid sequences using the NCBI translation table (http://www.ncbi.nlm.nih.gov/Taxonomy/taxonomyhome.html/index.cgi?chapter=tgencodes#SG1).

**Construction of a non-redundant gene catalog** **and** **calculation of gene abundance**

We constructed a non-redundant gene catalog using CD-HIT ([27] http://www.bioinformatics.org/cd-hit/, version 4.6.1) with 90% sequence identity and 90% coverage. After quality control, the reads were mapped to the non-redundant gene catalog with 95% identity using SOAPaligner ([28] http://soap.genomics.org.cn/, version 2.21), and gene abundance in each sample was evaluated.

**Analysis of microorganisms with nitrogen metabolism genes**

After constructing non-redundant gene catalogs for the nitrogen and phosphorus cycles, we used BLASTP ([29] Version 2.2.28+, http://blast.ncbi.nlm.nih.gov/Blast.cgi), with BLAST alignment parameters set at an expectation of 1e-5 to compare the non-redundant gene catalogs with the NR Database (Non-Redundant Protein Database). We obtained a taxonomy information database corresponding to the NR database for the microorganism (genus level) annotation results.

**Calculation of average variation degree (AVD)**

| *AVD* = | (1) |
| --- | --- |

where *i* is the operational taxonomy unit (OTU), *k* is the total number of samples, *n* is the total number of OTUs, and *ai* is the variation degree of the OTU*i*, and is calculated as follows:

|  | (2) |
| --- | --- |

where *xi* is the abundance of OTU *i* in each sample, and and δ*i* are the mean and standard deviation of OTU*i* abundance, respectively.

**Calculation and classification of β nearest-taxon index (βNTI)**

A value of |β*NTI*| ≥ 2 implies that coexisting communities is significantly higher than phylogenetic turnover, defined as the dominant deterministic process. In contrast, a value of |β*NTI*| < 2 means that the coexisting community is significantly lower than the phylogenetic turnover, defined as the dominant stochastic process. On this basis, we divided the deterministic processes and stochastic processes into five ecological processes based on the Raup–Crick index (RCBray) values of β*NTI* and the Bray–Curtis index. These processes include homogeneous selection (HoS) (β*NTI* < –2), heterogeneous selection (HeS) (β*NTI* > +2), dispersal limitation (DL) (|β*NTI*| < 2 and RCBray > 0.95), homogenizing dispersal (HD) (|β*NTI* | < 2 and RCBray < 0.95), and drift (DR) (|β*NTI* | < 2 and |RCBray| < 0.95). Here, homogeneous selection means that environmental conditions favor the development of similar communities, heterogeneous selection means that environmental conditions favor the development of different communities, dispersal limitation means that barriers to dispersal cause communities to become more heterogeneous, homogenizing dispersal means that dispersal is sufficiently easy that communities become more homogeneous, and drift means that communities increasingly differ, regardless of whether dispersal is promoted or constrained. All of these processes may occur simultaneously, but with different contributions to the overall change in a community.

**Supplementary References**

1. Wu J, He M. Research progress on the mechanism and application of microorganism denitrification. Adv Microbiol. 2024; 13: 75-81. https://doi.org/10.12677/amb.2024.132008. (in Chinese with English Abstract).

2. Huang M, Cui Y, Huang J, Sun F, Chen, S. A novel *Pseudomonas aeruginosa* strain performs simultaneous heterotrophic nitrification-aerobic denitrification and aerobic phosphate removal. Water Res. 2022; 221: 118823. https://doi.org/10.1016/j.watres.2022.118823.

3. Abdelhamed H, Nho SW, Karsi A, Lawrence ML. The role of denitrification genes in anaerobic growth and virulence of *Flavobacterium columnare*. J Appl Microbiol. 2021; 130: 1062-1074. https://doi.org/10.1111/jam.14855.

4. Xia L, Li X, Fan W, Wang J. Heterotrophic nitrification and aerobic denitrification by a novel *Acinetobacter sp*. ND7 isolated from municipal activated sludge. Bioresour Technol. 2020; 301: 122749. https://doi.org/10.1016/j.biortech.2020.122749.

5. Li J, Constantine U, Leng Y, Zhang X, Li S, Chen X. Progress on the study of biodegradation of organic pollutants and adsorption of heavy metals with *Arthrobacter* strains. Environ Sci Technol. 2017; 40: 89-97. https://doi.org/10.3969/j.issn.1003-6504.2017.10.016. (in Chinese with English Abstract).

6. Xing W, Li J, Li D, Hu J, Deng S, Cui Y, et al. Stable-isotope probing reveals the activity and function of autotrophic and heterotrophic denitrifiers in nitrate removal from organic-limited wastewater. Environ Sci Technol. 2018; 52: 7867-7875. https://doi.org/10.1021/acs.est.8b01993.

7. Zheng Q, Lu J, Wang Y, Jiao N. Genomic reconstructions and potential metabolic strategies of generalist and specialist heterotrophic bacteria associated with an estuary *Synechococcus* culture. FEMS Microbiol Ecol. 2019; 95: https://doi.org/10.1093/femsec/fiz017.

8. Zhang Y, Wan F, Zhou J. Anaerobic reduction process characteristics and microbial community analysis for sulfate and Fe(Ⅱ) EDTA-NO/Fe(Ⅲ) EDTA. Environ Sci. 2017; 38: 4706-4714. https://doi.org/10.13227/j.hjkx.201704227. (in Chinese with English Abstract).

9. Zhang Z, Ali M, Tang Z, Sun Q, Wang Q, Liu X, et al. Unveiling complete natural reductive dechlorination mechanisms of chlorinated ethenes in groundwater: insights from functional gene analysis. J Hazard Mater. 2024; 469: 134034. https://doi.org/10.1016/j.jhazmat.2024.134034.

10. Li R, Li Y, Kristiansen K, Wang J. SOAP: short oligonucleotide alignment program. Bioinformatics. 2008; 24: 713-714. https://doi.org/10.1093/bioinformatics/btn025.

11. Hou L, Jiang J, Jiang J, Xu Z, Liang Z. Isolation of *Pseudoxanthomonas* sp.J1 and bioinformatics analysis of lignocellulose-degrading genes. J Nanjing Agric Univ. 2016; 39: 573-581. https://doi.org/10.7685/jnau.201512026. (in Chinese with English Abstract).

12. Millan-Oropeza A, Henry C, Blein-Nicolas M, Aubert-Frambourg A, Moussa F, Bleton J, et al. Quantitative proteomics analysis confirmed oxidative metabolism predominates in *Streptomyces coelicolor* versus glycolytic metabolism in *Streptomyces lividans*. J Proteome Res. 2017; 16: 2597-2613. https://doi.org/10.1021/acs.jproteome.7b00163.

13. Mao Y, Zhang X, Xia X, Zhong H, Zhao L. Versatile aromatic compound-degrading capacity and microdiversity of *Thauera* strains isolated from a coking wastewater treatment bioreactor. J Ind Microbiol Biotechnol. 2010; 37: 927-934. https://doi.org/10.1007/s10295-010-0740-7.

14. Zhao S, Zhou T, Wang B, Liang T, Liu L. Isolation, identification, and biodegradation behaviors of a perfluorooctane sulfonic acid precursor (PreFOSs) degrading bacterium from contaminated soil. Environ Sci. 2018; 39: 3321-3328. https://doi.org/10.13227/j.hjkx.201711269. (in Chinese with English Abstract).

15. Yang H, Jia R, Chen B, Li L. Degradation of recalcitrant aliphatic and aromatic hydrocarbons by a dioxin-degrader *Rhodococcus* sp strain p52. Environ Sci Pollut Res. 2014; 21: 11086-11093. https://doi.org/10.1007/s11356-014-3027-0.

16. Yuan L, Peng P, Shen T, Xie Q. Review on petroleum hydrocarbon-degrading microbes. Chin Bull Life Sci. 2019; 31: 1088-1097. https://doi.org/10.13376/j.cbls/2019134. (in Chinese with English Abstract).

17. Zhou M, Liu Z, Wang J, Zhao Y, Hu B. *Sphingomonas* relies on chemotaxis to degrade polycyclic aromatic hydrocarbons and maintain dominance in coking sites. Microorganisms. 2022; 10: 1109. https://doi.org/10.3390/microorganisms10061109.

18. Qian Y, Xu M, Deng T, Hu W, He Z, Yang X, et al. Synergistic interactions of *Desulfovibrio* and *Petrimonas* for sulfate-reduction coupling polycyclic aromatic hydrocarbon degradation. J Hazard Mater. 2021; 407: 124385. https://doi.org/10.1016/j.jhazmat.2020.124385.

19. Zhang L, Fang W, Li X, Gao G, Jiang J. Linking bacterial community shifts with changes in the dissolved organic matter pool in a eutrophic lake. Sci Total Environ. 2020; 719: 137387. https://doi.org/10.1016/j.scitotenv.2020.137387.

20. Hao T, Lin Q, Ma J, Tang W, Xiao Y, Guo G. Microbial behaviours inside alternating anaerobic-anoxic environment of a sulfur cycle-driven EBPR system: a metagenomic investigation. Environ Res. 2022; 212: 113373. https://doi.org/10.1016/j.envres.2022.113373.

21. Shi L, Rosso KM, Clarke TA, Richardson DJ, Zachara JM, Fredrickson JK. Molecular underpinnings of Fe(III) oxide reduction by *Shewanella oneidensis* MR-1. Front Microbiol. 2012; 3: 50. https://doi.org/10.3389/fmicb.2012.00050.

22. Lu Y, Hu Y, Tang L, Xie Q, Liu Q, Zhong L, et al. Effects and mechanisms of modified biochars on microbial iron reduction of *Geobacter sulfurreducens*. Chemosphere. 2021; 283: 130983. https://doi.org/10.1016/j.chemosphere.2021.130983.

23. Chen S, He S, Wu C, Du D. Characteristics of heterotrophic nitrification and aerobic denitrification bacterium *Acinetobacter* sp. T1 and its application for pig farm wastewater treatment. J Biosci Bioeng. 2019; 127: 201-205. https://doi.org/10.1016/j.jbiosc.2018.07.025.

24. Niu J, Wan Y, Ma Z, Wang Z, Dong W, Su X, et al. Driving mechanism of different nutrient conditions on microbial mediated nitrate reduction in magnetite-present river infiltration zone. Sci Total Environ. 2024; 926: 171963. https://doi.org/10.1016/j.scitotenv.2024.171963.

25. Saeid A, Prochownik E, Dobrowolska-Iwanek J. Phosphorus solubilization by *Bacillus* Species. Molecules. 2018; 23: 2897. https://doi.org/10.3390/molecules23112897.

26. Noguchi H, Park J, Takagi T. MetaGene: prokaryotic gene finding from environmental genome shotgun sequences. Nucleic Acids Res. 2006; 34: 5623-5630. https://doi.org/10.1093/nar/gkl723.

27. Fu L, Niu B, Zhu Z, Wu S, Li W. CD-HIT: accelerated for clustering the next-generation sequencing data. Bioinformatics. 2012; 28: 3150-3152. https://doi.org/10.1093/bioinformatics/bts565.

28. Li G, Liu Y, W Y, Ding D. A study of effect of *Thiobacillus ferrooxidans* and *Thiobacillus thiooxidans* on leaching of U4+. Chin J Nucl Sci Eng. 2008; 28: 381-384. https://doi.org/10.3321/j.issn:0258-0918.2008.04.017. (in Chinese with English Abstract).

29. Altschul SF, Madden TL, Schaffer AA, Zhang JH, Zhang Z, Miller W, et al. Gapped BLAST and PSI-BLAST: a new generation of protein database search programs. Nucleic Acids Res. 1997; 2: 3389-3402. https://doi.org/10.1093/nar/25.17.3389.
